# Supplementary material
Source: HighWire-hosted journal article supplement (https://bmjopen.bmj.com/content/10/9/e040487)
Supplement: inline-supplementary-material-1 [file inline-supplementary-material-1.xlsx]

## Sheet: S1
Item		Overall number of websites (n, %)	High-scoring websites (n, %)	Low-scoring websites (n,%)	OR	95% CI	P Value
Modified EQIP Content Data
1. Initial definition of which subjects will be covered	Yes	274 (85.36%)	71 (95.95%)	203 (82.19%)	5.10204	1.560 - 26.316	0.002
	No	47 (14.64%)	3 (4.05%)	44 (17.81%)
2. Coverage of the previously defined subjects (NA if the answer is “no” for item 1)	Yes	273 (85.05%)	71 (95.95%)	202 (81.78%)	3.50877	0.483 - 166.667	0.3
	No	48 (14.95%)	3 (4.05%)	45 (18.22%)
3. Description of the medical problem/treatment/procedure	Yes	251 (78.19%)	73 (98.65%)	178 (72.06%)	5.88235	3.215 - 10.870	<0.001
	No	70 (21.81%)	1 (1.35%)	69 (27.94%)
4. Definition of the purpose of the interventions	Yes	216 (67.29%)	67 (90.54%)	149 (60.32%)	27.7778	4.695 - 1000.000	<0.001
	No	105 (32.71%)	7 (9.46%)	98 (39.68%)
5. Description of treatment alternatives (conservative management)	Yes	82 (25.55%)	40 (54.05%)	42 (17%)	6.25	2.725 - 16.949	<0.001
	No	239 (74.45%)	34 (45.95%)	205 (83%)
6. Description of the sequence of the interventions and surgical procedure	Yes	51 (15.89%)	26 (35.14%)	25 (10.12%)	4.78469	2.427 - 9.434	<0.001
	No	270 (84.11%)	48 (64.86%)	222 (89.88%)
7. Description of the qualitative benefits for the patient	Yes	114 (35.51%)	46 (62.16%)	68 (27.53%)	4.31034	2.416 - 7.752	<0.001
	No	207 (64.49%)	28 (37.84%)	179 (72.47%)
8. Description of the quantitative benefits to the patient	Yes	9 (2.8%)	3 (4.05%)	6 (2.43%)	1.69492	0.267 - 8.197	0.436
	No	312 (97.2%)	71 (95.95%)	241 (97.57%)
9. Description of the qualitative risks and complications	Yes	49 (15.26%)	25 (33.78%)	24 (9.72%)	4.71698	2.370 - 9.434	<0.001
	No	272 (84.74%)	49 (66.22%)	223 (90.28%)
10. Description of the quantitative risks and complications	Yes	3 (0.93%)	3 (4.05%)	0 (0%)	-	-	0.012
	No	318 (99.07%)	71 (95.95%)	247 (100%)
11. Addressing quality-of-life issues	Yes	137 (42.68%)	58 (78.38%)	79 (31.98%)	7.63359	4.032 - 15.152	<0.001
	No	184 (57.32%)	16 (21.62%)	168 (68.02%)
12. Description of how complications are handled	Yes	35 (10.9%)	20 (27.03%)	15 (6.07%)	5.68182	2.584 - 12.821	<0.001
	No	286 (89.1%)	54 (72.97%)	232 (93.93%)
13. Description of the precautions that the patient may take	Yes	265 (82.55%)	70 (94.59%)	195 (78.95%)	4.65116	1.621 - 18.519	0.001
	No	56 (17.45%)	4 (5.41%)	52 (21.05%)
14. Mention of alert signs that the patient may detect	Yes	212 (66.04%)	66 (89.19%)	146 (59.11%)	5.68182	2.571 - 14.286	<0.001
	No	109 (33.96%)	8 (10.81%)	101 (40.89%)
15. Addressing medical intervention costs and insurance issues	Yes	68 (21.18%)	31 (41.89%)	37 (14.98%)	3.96825	2.137 - 7.407	<0.001
	No	253 (78.82%)	43 (58.11%)	210 (85.02%)
16. Specific contact details for hospital services (NA if not hospitals)	Yes	10 (3.12%)	3 (4.05%)	7 (2.83%)	-	-	0.228
	No	311 (96.88%)	71 (95.95%)	240 (97.17%)
17. Specific details of other sources of reliable information/support	Yes	185 (57.63%)	62 (83.78%)	123 (49.8%)	5.18135	2.604 - 11.111	<0.001
	No	136 (42.37%)	12 (16.22%)	124 (50.2%)
18. Coverage of all relevant issues for the topic (summary item for all content criteria)	Yes	4 (1.25%)	4 (5.41%)	0 (0%)	-	-	0.003
	No	317 (98.75%)	70 (94.59%)	247 (100%)
Modified EQIP Identification Data
19. Date of issue or revision	Yes	280 (87.23%)	69 (93.24%)	211 (85.43%)	2.34742	0.870 - 8.000	0.11
	No	41 (12.77%)	5 (6.76%)	36 (14.57%)
20. Logo of the issuing body	Yes	317 (98.75%)	74 (100%)	243 (98.38%)	-	-	0.577
	No	4 (1.25%)	0 (0%)	4 (1.62%)
21. Names of the persons or entities that produced the document	Yes	254 (79.13%)	61 (82.43%)	193 (78.14%)	1.31234	0.652 - 2.801	0.515
	No	67 (20.87%)	13 (17.57%)	54 (21.86%)
22. Names of the persons or entities that financed the document	Yes	210 (65.42%)	62 (83.78%)	148 (59.92%)	3.44828	1.727 - 7.407	<0.001
	No	111 (34.58%)	12 (16.22%)	99 (40.08%)
23. Short bibliography of the evidence-based data used in the document	Yes	60 (18.69%)	31 (41.89%)	29 (11.74%)	5.37634	1.727 - 7.407	<0.001
	No	261 (81.31%)	43 (58.11%)	218 (88.26%)
24. Statement about whether and how patients were involved/consulted in the document's production	Yes	3 (0.93%)	1 (1.35%)	2 (0.81%)	1.67504	1.727 - 7.407	0.546
	No	318 (99.07%)	73 (98.65%)	245 (99.19%)
Modified EQIP Structure Data
25. Use of everyday language and explanation of complex words or jargon	Yes	3 (0.93%)	72 (97.3%)	229 (92.71%)	2.82486	0.650 - 25.64	0.181
	No	318 (99.07%)	2 (5.41%)	18 (25.35%)
26. Use of generic names for all medications or products (NA if no medications described)	Yes	88 (27.41%)	35 (47.3%)	53 (21.46%)	1.83824	0.561 - 7.143	0.309
	No	233 (44.05%)	39 (35.14%)	194 (46.41%)
27. Use of short sentences (<15 words on average)	Yes	296 (92.21%)	72 (97.3%)	224 (90.69%)	3.69004	0.875 - 33.333	0.082
	No	25 (9.47%)	2 (2.99%)	23 (11.68%)
28. Personal address to the reader	Yes	239 (74.45%)	65 (87.84%)	174 (70.45%)	3.02115	1.401 - 7.299	0.002
	No	82 (21.03%)	9 (10.98%)	73 (23.7%)
29. Respectful tone	Yes	308 (95.95%)	73 (98.65%)	235 (95.14%)	3.71747	0.533 - 166.667	0.312
	No	13 (4.22%)	1 (1.35%)	12 (5.13%)
30. Clear information (no ambiguities or contradictions)	Yes	295 (91.9%)	73 (98.65%)	222 (89.88%)	8.19672	1.294 - 333.333	0.013
	No	26 (31.71%)	1 (3.33%)	25 (48.08%)
31. Balanced information on risks and benefits	Yes	56 (17.45%)	29 (39.19%)	27 (10.93%)	5.20833	2.703 - 10.101	<0.001
	No	265 (47.58%)	45 (37.82%)	220 (50.23%)
32. Presentation of information in a logical order	Yes	292 (90.97%)	74 (100%)	218 (88.26%)	-	-	0.001
	No	29 (9.12%)	0 (0%)	29 (11.84%)
33. Satisfactory design and layout (excluding figures or graphs; see next item)	Yes	289 (90.03%)	73 (98.65%)	216 (87.45%)	10.4167	1.675 - 500.000	0.003
	No	32 (22.38%)	1 (2.33%)	31 (31%)
34. Clear and relevant figures or graphs (NA if absent)	Yes	111 (34.58%)	42 (56.76%)	69 (27.94%)	12.987	3.086 - 111.111	<0.001
	No	210 (75.27%)	32 (65.31%)	178 (77.39%)
35. Inclusion of a named space for the reader's notes or questions	Yes	69 (21.5%)	17 (22.97%)	52 (21.05%)	1.11857	0.561 - 2.151	0.748
	No	252 (100%)	57 (100%)	195 (100%)
36. Inclusion of a printed consent form contrary to recommendations (NA if not from hospitals)	Yes	0 (0%)	0 (0%)	0 (0%)	-	-	-
	No	321 (100%)	74 (100%)	247 (100%)
*Some data is omitted due to odds ratio and confidence interval being infinite values
