# Supplementary material
Source: HighWire-hosted journal article supplement (https://bmjopen.bmj.com/content/10/9/e040487)
Supplement: inline-supplementary-material-2 [file inline-supplementary-material-2.xlsx]

## Sheet: S2
Item		Overall number of websites (n, %)	High-scoring websites (n, %)	Low-scoring websites (n,%)	OR	95% CI	P Value
JAMA Benchmark
1. Authorship: Authors and contributors, their affiliations, and relevant credentials should be provided	Yes	183 (57.01%)	74 (100%)	109 (44.13%)	-	-	<0.001
	No	138 (42.99%)	0 (0%)	138 (55.87%)
2. Attribution: References and sources for all content should be listed clearly, and all relevant copyright information noted	Yes	118 (36.76%)	74 (100%)	44 (17.81%)	-	-	<0.001
	No	203 (63.24%)	0 (0%)	203 (82.19%)
3. Disclosure: Web site "ownership", sponsorship, funding arrangements or conflicts of interests should be prominently and fully disclosed	Yes	287 (89.41%)	74 (100%)	213 (86.23%)	-	-	<0.001
	No	34 (10.59%)	0 (0%)	34 (13.77%)
4. Currency: Dates that content was posted and updated should be indicated	Yes	276 (85.98%)	74 (100%)	202 (81.78%)	-	-	<0.001
	No	45 (14.02%)	0 (0%)	45 (18.22%)
*Some data is omitted due to odds ratio and confidence interval being infinite values
